# Supplementary material for: Kinetic and in situ FTIR study of CO methanation on a Rh/Al2O3 catalyst
Source: Royal Society of Chemistry journal article supplement (doi:10.1039/c5cy00676g), 2015-01-01
Supplement: c5cy00676g1.pdf [file c5cy00676g1.pdf]

## Supporting Information

### Kinetic and *in-situ* FTIR study of CO methanation on a Rh/Al<sub>2</sub>O<sub>3</sub> catalyst.

Mauricio Escobar<sup>a,c</sup>, Francisco Gracia<sup>b</sup>, Alejandro Karelovic<sup>a</sup>, Romel Jiménez<sup>a\*</sup>

<sup>a</sup>Department of Chemical Engineering, Universidad de Concepción, Chile

<sup>b</sup>Department of Chemical Engineering and Biotechnology, Universidad de Chile, Chile

<sup>c</sup> Current address: Technological Development Unit (UDT) of the Universidad de Concepcion, Parque Industrial Coronel, Coronel, Chile

\* Corresponding author: [romeljimenez@udec.cl](mailto:romeljimenez@udec.cl)

#### S1. Effect of CO pressure on forward turnover formation rate of CH<sub>4</sub>.

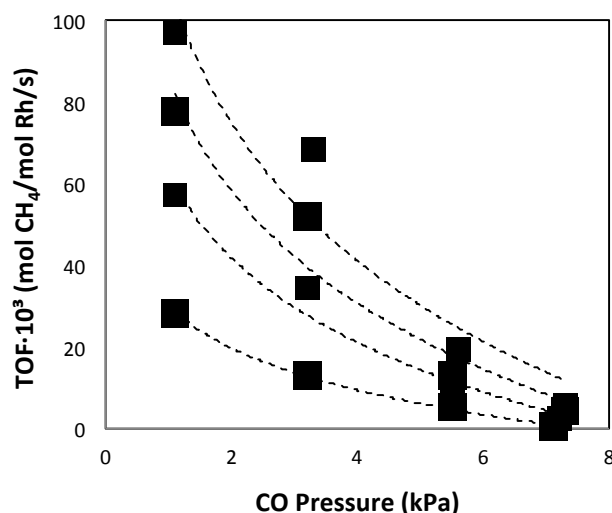

Figure S1. Forward turnover formation rate of CH<sub>4</sub> on Rh/Al<sub>2</sub>O<sub>3</sub> as a function of CO pressures at 300°C. P<sub>H<sub>2</sub></sub> (0 – 22.5 kPa), P<sub>H<sub>2</sub></sub>: (◆) 5.8 kPa, (●) 11.0 kPa, (◻) 16.0 kPa, (◼) 21.5 kPa. Space velocity: 4 – 10 cm<sup>3</sup>·s<sup>-1</sup>·g<sub>cat</sub><sup>-1</sup>.

#### S2. Derivation for Langmuir-Hinshelwood rate expressions.

The symbols  $\rightleftharpoons$ ,  $\rightarrow$  and  $\rightleftharpoons$  represent the quasi-equilibrated, irreversible and reversible steps, respectively.

The CO and H<sub>2</sub> adsorptions have been assumed as quasi-equilibrated steps Scheme 1, steps 1 and 2), therefore the CO\* and H\* are calculated by Equations S1 and S2, where  $\theta_*$  represents the fractional concentration of vacancies.

$$\theta_{CO^*} = K_{CO} \cdot P_{CO} \cdot \theta_* \quad (\text{Eq.S1})$$

$$\theta_{H^*} = K_{H_2}^{0.5} \cdot P_{H_2}^{0.5} \cdot \theta_* \quad (\text{Eq.S2})$$

$K_{H_2}$  and  $K_{CO}$  represent the equilibrium constants for the molecular CO adsorption and the dissociative  $H_2$  adsorption, respectively.

S.2.1. Unassisted C-O bond dissociation mechanism.

Scheme 1

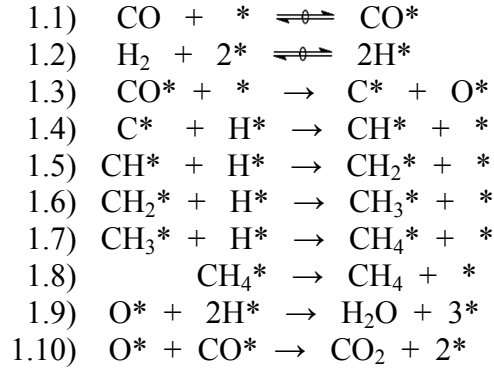

Since the reaction rates for the steps 1.3 and 1.8 are equal at steady state condition, the methane formation rate can be calculated as:

$$r_{CH_4} = k_{1.3} \cdot \theta_{CO^*} \cdot \theta_* \quad (\text{Eq.S3})$$

For a site balance with vacancy,  $H^*$  and  $CO^*$  as MASI,

$$\theta_* = \frac{1}{(1 + K_{H_2}^{0.5} P_{H_2}^{0.5} + K_{CO} P_{CO})}$$

(Eq.S4)

Substituting Eqs.S1, S2 and S4 into Eq.S3 leads to Eq.5 in the manuscript.

$$r_{CH_4} = \frac{k P_{CO}}{(1 + K_{H_2}^{0.5} P_{H_2}^{0.5} + K_{CO} P_{CO})^2} \quad (5)$$

For a site balance with vacancy and  $CO^*$  as MASI,

$$\theta_* = \frac{1}{(1 + K_{CO} P_{CO})}$$

(Eq.S5)

Substituting Eqs.S1, S2 and S5 into Eq.S3 leads to Eq.6 in the manuscript.

$$r_{CH_4} = \frac{kP_{CO}}{(1 + K_{CO}P_{CO})^2} \quad (6)$$

S.2.2. C-O bond dissociates after first H\* addition.

Scheme 2.

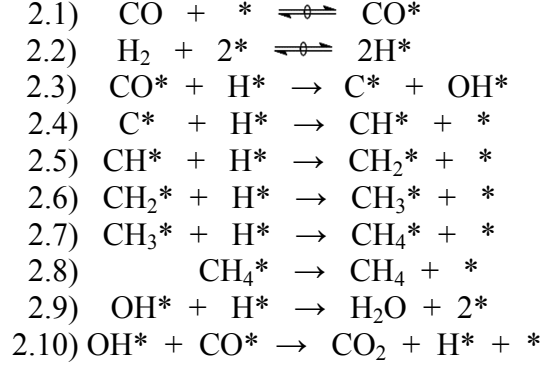

At steady state conditions Eq.S6 determines the methane formation rate:

$$r_{CH_4} = k_{2.3} \cdot \theta_{CO^*} \cdot \theta_{H^*} \quad (\text{Eq.S6})$$

In-situ FTIR measurements are consistent with the site balance represented by Eq.S5;

Therefore, substituting Eqs.S1, S2 and S5 into Eq.S6 leads to Eq.7 in the manuscript.

$$r_{CH_4} = \frac{k_{2.3} K_{CO} K_{H_2}^{0.5} P_{CO} P_{H_2}^{0.5}}{(1 + K_{CO} P_{CO})^2} = \frac{\alpha_2 \cdot P_{CO} P_{H_2}^{0.5}}{(1 + K_{CO} P_{CO})^2} \quad (7)$$

S.2.3. C-O bond dissociates after the second H\* addition.

Scheme 3.

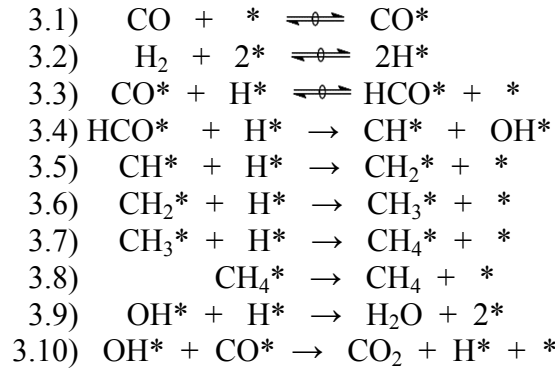

At steady state conditions Eq.S7 represents the methane formation rate:

$$r_{CH_4} = k_{3.4} \cdot \theta_{HCO^*} \cdot \theta_{H^*} \quad (\text{Eq.S7})$$

Substituting Eqs.S1, S2 and S5 into Eq.S7 leads to Eq.8 in the manuscript.

$$r_{CH_4} = \frac{k_{3.4} K_{HCO} K_{CO} K_{H_2} P_{CO} P_{H_2}}{(1 + K_{CO} P_{CO})^2} = \frac{\alpha_3 \cdot P_{CO} P_{H_2}}{(1 + K_{CO} P_{CO})^2} \quad (8)$$

$K_{HCO}$  represents the equilibrium constants for the surface reaction of HCO\* formation.

#### S.2.4. The CO disproportionation mechanism.

This could be considered as a particular case of the direct (unassisted) CO dissociation mechanism (Scheme 1), in which the reaction rate is determined by the combination of two CO\* species to form C\* and CO<sub>2</sub>.

Scheme 4.

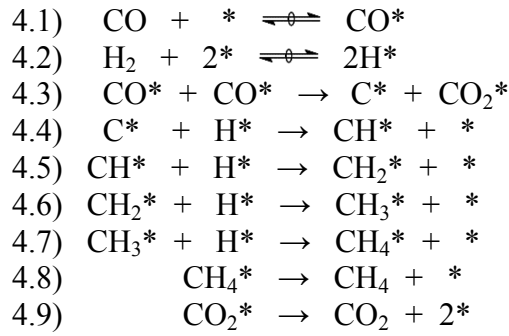

At steady state conditions, the methane formation rate is defined by the rate of C\* formation in the disproportionation step (4.3):

$$r_{CH_4} = k_{4.3} \cdot \theta_{CO^*}^2 \quad (\text{Eq.S8})$$

Substituting Eqs.S1 and S5 into Eq.S8 leads to Eq.S9.

$$r_{CH_4} = \frac{k_{4.3} \cdot P_{CO}^2}{(1 + K_{CO} P_{CO})^2} \quad (\text{Eq.S9})$$

This kinetic model does not properly represent the kinetic data reported in the manuscript because neither contain the positive effect of H<sub>2</sub> pressure on reaction rate nor is consistent with the negative effect of CO pressure on methane formation rate.
